# Supplementary material for: K63 Ubiquitination of P21 Can Facilitate Pellino-1 in the Context of Chronic Obstructive Pulmonary Disease and Lung Cellular Senescence
Source: MDPI journal article supplement (doi:10.3390/cells11193115), 2022-10-03
Supplement: s1 [file s1]

# K63 Ubiquitination of P21 Can Facilitate Pellino-1 in the Context of Chronic Obstructive Pulmonary Disease and Lung Cellular Senescence

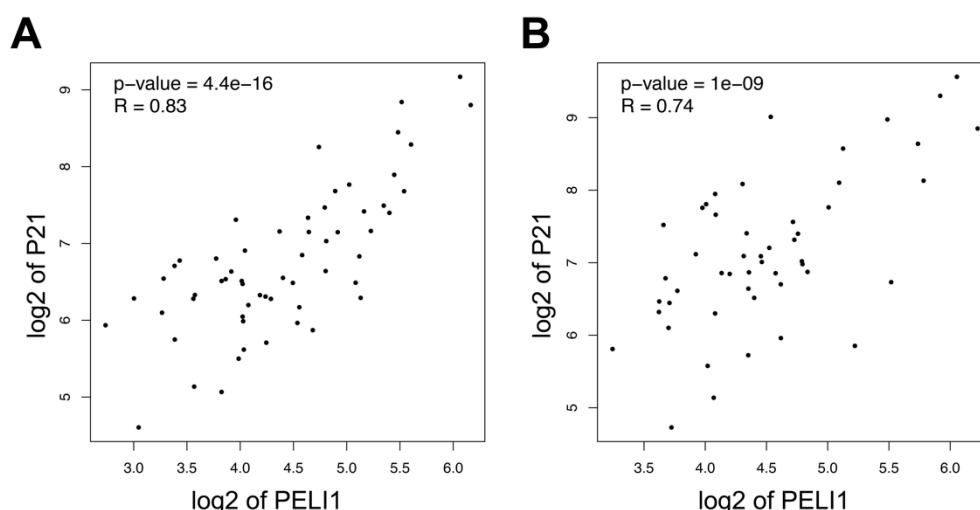

**Figure S1. Relationship between PELI1 and p21 in TCGA para-carcinoma lung tissue. Related to Figure 1. (A)** The relationship between PELI1 and p21 was significant in para-carcinoma lung tissue of the TCGA Lung adenocarcinoma (LUAD) database. **(B)** Relationship between PELI1 and p21 was significant in para-carcinoma lung tissue of TCGA Lung squamous cell carcinoma (LUSC) database. Data represent R for relative coefficient and P for significance.

**Table S1.** Primer for RT-qPCR.

| Primer Name           | Sequence                 | Length | Tm   |
|-----------------------|--------------------------|--------|------|
| GAPDH Forward         | CATGTACGTTGCTATCCAGGC    | 21     | 60.8 |
| GAPDH Reverse         | CTCCTTAATGTCACGCACGAT    | 21     | 60.2 |
| Pellino-1 Forward     | CAGCACTGTGCATATTGCTTG    | 21     | 60.2 |
| Pellino-1 Reverse     | CGGCCAATCTGAAACATATCGG   | 22     | 61.4 |
| P21 Forward           | TGTCCGTCAGAACCCATGC      | 19     | 62.0 |
| P21 Reverse           | AAAGTCGAAGTTCCATCGCTC    | 21     | 60.4 |
| IL-6 Forward          | ACTCACCTCTTCAGAACGAATTG  | 23     | 60.2 |
| IL-6 Reverse          | CCATCTTTGGAAGGTTTCAGGTTG | 23     | 61.3 |
| IL-1 $\alpha$ Forward | TGGTAGTAGCAACCAACGGGA    | 21     | 62.9 |
| IL-1 $\alpha$ Reverse | ACTTTGATTGAGGGCGTCATTC   | 22     | 60.9 |
| MMP-9 Forward         | TGTACCGCTATGGTTACACTCG   | 22     | 61.5 |
| MMP-9 Reverse         | GGCAGGGACAGTTGCTTCT      | 19     | 61.9 |
| MMP-12 Forward        | CATGAACCGTGAGGATGTTGA    | 21     | 60.0 |
| MMP-12 Reverse        | GCATGGGCTAGGATTCCACC     | 20     | 62.4 |
| TNF- $\alpha$ Forward | TCCTGTGGAAGATCACCAATGT   | 22     | 61.0 |
| TNF- $\alpha$ Reverse | GCAGGCACAACCTTGATGCC     | 19     | 61.3 |
| CCL-2 Forward         | CAGCCAGATGCAATCAATGCC    | 21     | 62.3 |
| CCL-2 Reverse         | TGGAATCCTGAACCCACTTCT    | 21     | 60.4 |
| Cyclin E Forward      | AAGGAGCGGGACACCATGA      | 19     | 62.9 |
| Cyclin E Reverse      | ACGGTCACGTTTGCTTCC       | 19     | 62.8 |

**Table S2.** Antibodies and Material Sources.

| REAGENT or RESOURCE                                                          | SOURCE                          | IDENTIFIER                         |
|------------------------------------------------------------------------------|---------------------------------|------------------------------------|
| Antibodies                                                                   |                                 |                                    |
| Rabbit anti-P21 (human and mouse)                                            | Cell Signaling Technology (CST) | Cat# 37543;<br>Cat# 2947           |
| Rabbit anti-P16                                                              | CST                             | Cat# 18769                         |
| Rabbit anti-Cyclin E1                                                        | CST                             | Cat# 20808                         |
| Rabbit anti-Rb                                                               | CST                             | Cat# 9313                          |
| Rabbit anti-Phospho-Rb                                                       | CST                             | Cat# 8516                          |
| Rabbit anti-P53                                                              | CST                             | Cat# 2527                          |
| Rabbit anti-Pellino-1                                                        | CST                             | Cat# 31474                         |
| Rabbit anti-SKP2                                                             | CST                             | Cat# 2652                          |
| Rabbit anti-GAPDH                                                            | CST                             | Cat# 2118                          |
| Rabbit anti-HA                                                               | Abcam                           | Cat# ab236632                      |
| Goat anti-Rabbit IgG Secondary Antibody, Western Blot                        | Invitrogen                      | Cat# 31466                         |
| Goat anti-Rabbit IgG Secondary Antibody, Alexa Fluor 594                     | Invitrogen                      | Cat# A-11012                       |
| Goat anti-Rabbit IgG Secondary Antibody, Alexa Fluor 488                     | Invitrogen                      | Cat# A-11008                       |
| Chemicals, peptides, and recombinant proteins                                |                                 |                                    |
| Budesonide                                                                   | Med Chem Express                | Cat# HY-13580; CAS:<br>51333-22-3  |
| MG132                                                                        | Med Chem Express                | Cat# HY-13259; CAS:<br>133407-82-6 |
| D-Galactose                                                                  | Sigma-Aldrich                   | Cat# G5388;<br>CAS: 59-23-4        |
| CSE (5%)                                                                     | This paper                      | N/A                                |
| Critical commercial assays                                                   |                                 |                                    |
| Senescence $\beta$ -Galactosidase Staining Kit                               | Beyotime, Shanghai, China       | Cat# C0602                         |
| Cell Cycle Analysis Kit                                                      | Beyotime, Shanghai, China       | Cat# C1052                         |
| IHC ABC stain kit                                                            | Zsbio, Beijing, China           | Cat# PK-4002                       |
| H&E stain kit                                                                | Beyotime, Shanghai, China       | Cat# S0105                         |
| Lipid Peroxidation MDA Assay Kit                                             | Beyotime, Shanghai, China       | Cat# S0131                         |
| Total Superoxide Dismutase Assay Kit with NBT                                | Beyotime, Shanghai, China       | Cat# S0109                         |
| Mouse Tumor Necrosis Factor- $\alpha$ Enzyme-Linked Immuno-Sorbent Assay Kit | Beyotime, Shanghai, China       | Cat# PT512                         |
| Mouse Interleukin-6 Enzyme-Linked ImmunoSorbent Assay Kit                    | Beyotime, Shanghai, China       | Cat# PI326                         |
